# Supplementary material for: Development of a Rapid Fluorescent Immunochromatographic Test to Detect Respiratory Syncytial Virus
Source: PubMed Central journal article supplement (PMC6212954; doi:10.3390/ijms19103013), 2018-10-02
Supplement: ijms-19-03013-s001.pdf [file ijms-19-03013-s001.pdf]

Supplementary materials

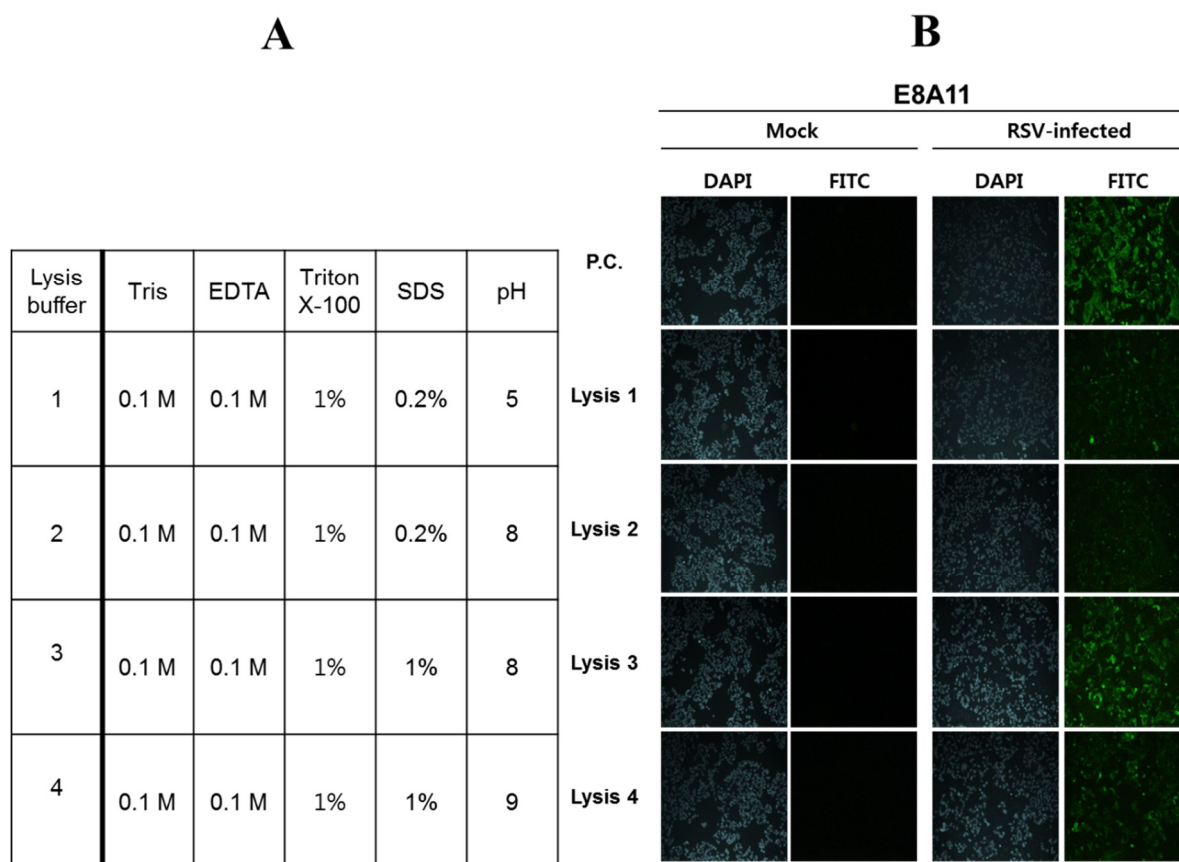

Figure S1. Effect of amount of SDS and different pH on E8A11 activity. Different condition of lysis buffer (A) and IFA result (B). Cells were infected with RSV for 24 h and fixed with 4% paraformaldehyde. After fixation, cells were treated with lysis buffer (1-4) and washed with PBST three times. Fluorescence was detected with a FITC-conjugated secondary antibody. P.C., commercial anti-RSV Fusion antibody

# A

BSA 0 µg/mL

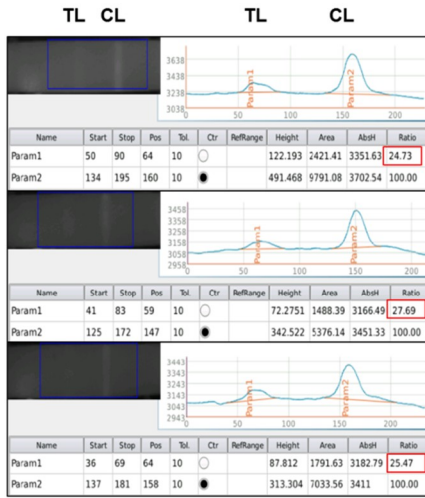

BSA 0.31 µg/mL

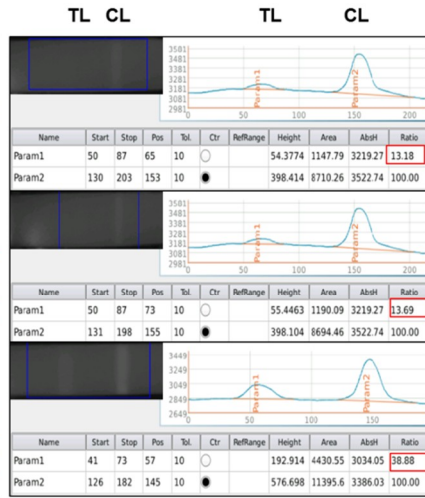

BSA 0.63 µg/mL

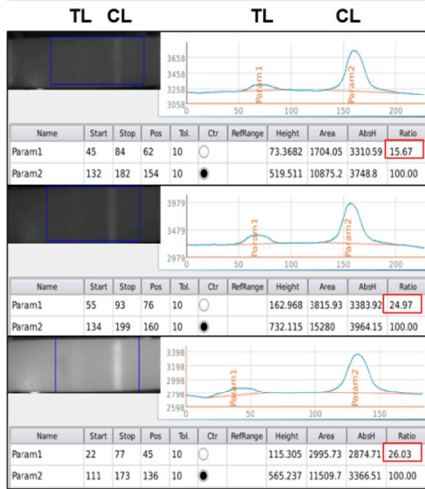

BSA 01.25 µg/mL

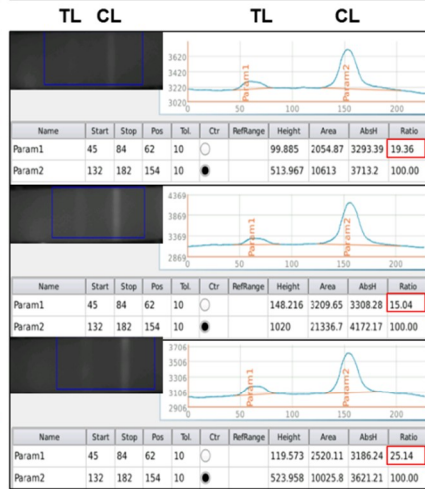

BSA 2.5 µg/mL

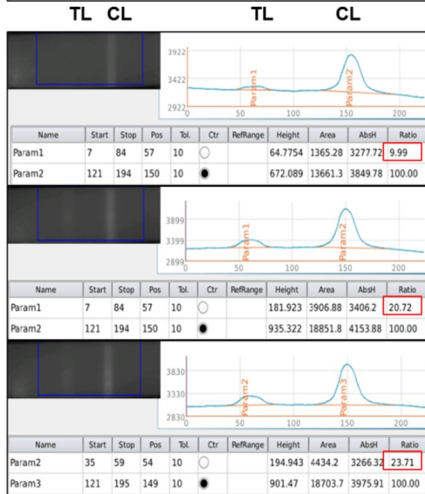

BSA 5 µg/mL

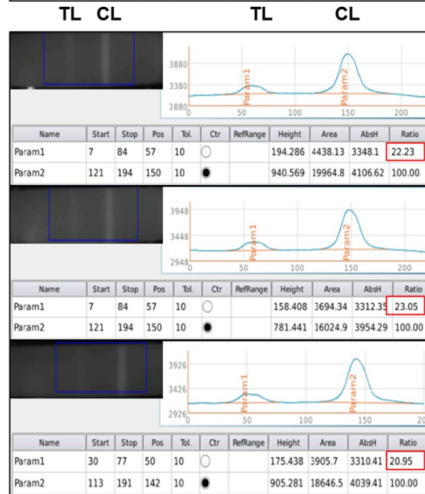

## B

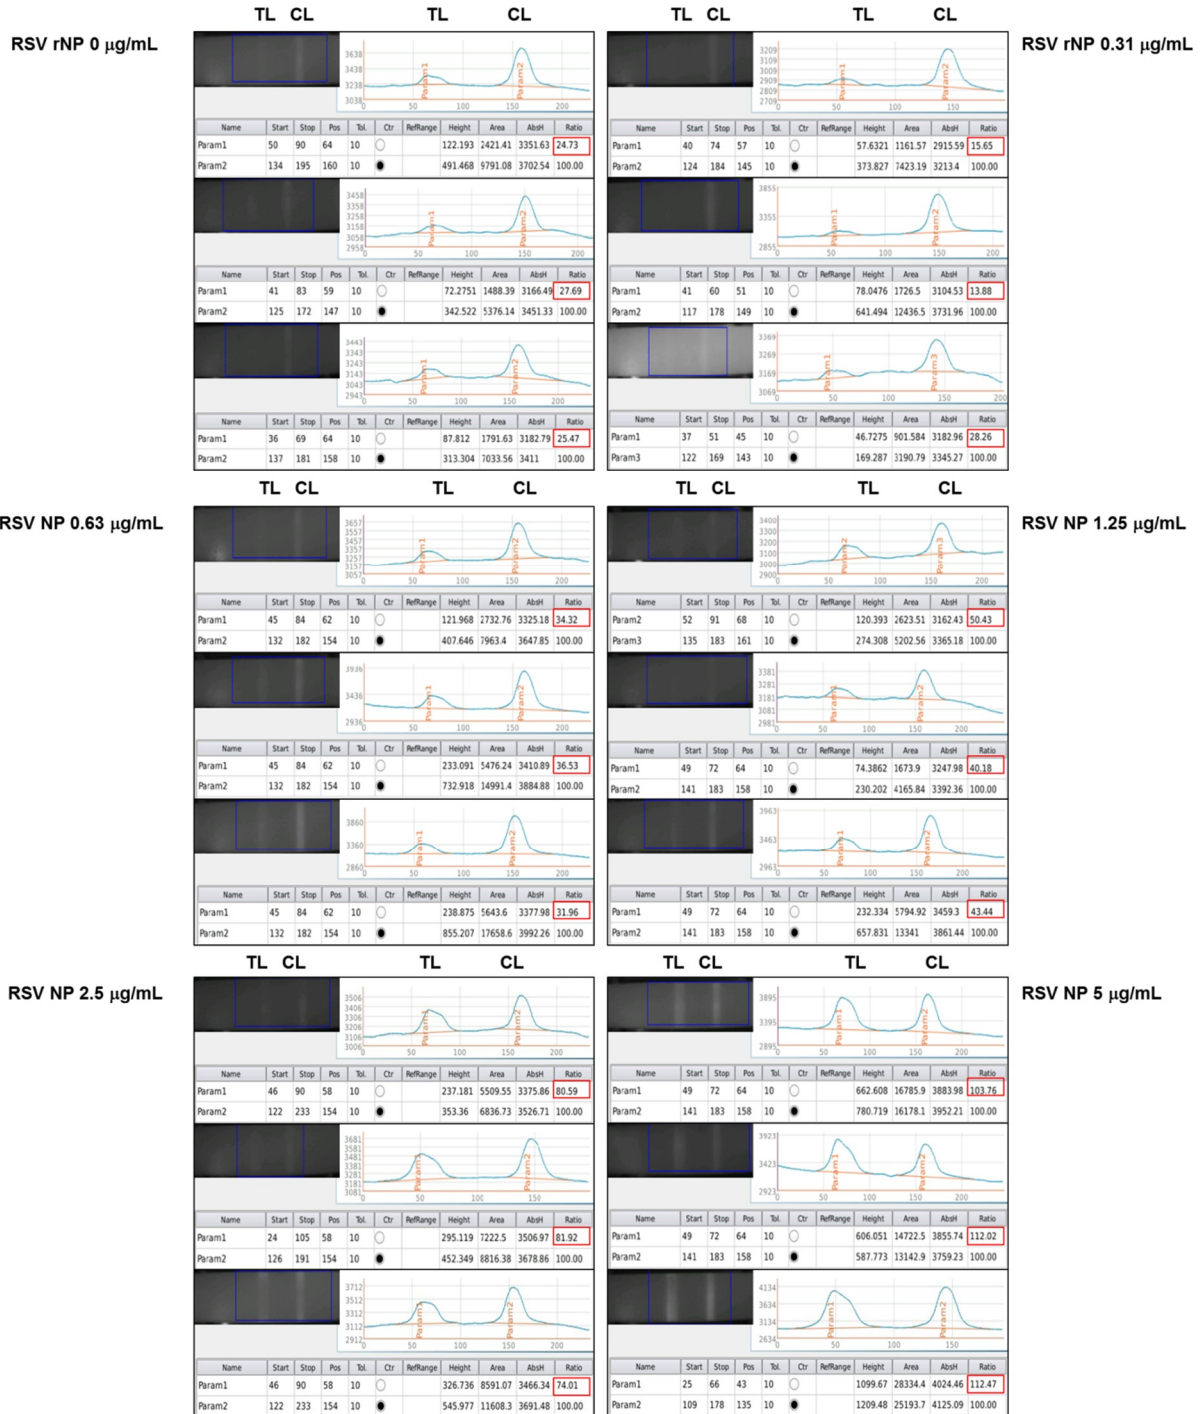

**Figure S2. Raw data of FICT assay with antigen. BSA (A) and RSV rNP(B). Red box indicates each value of TL/CL.**

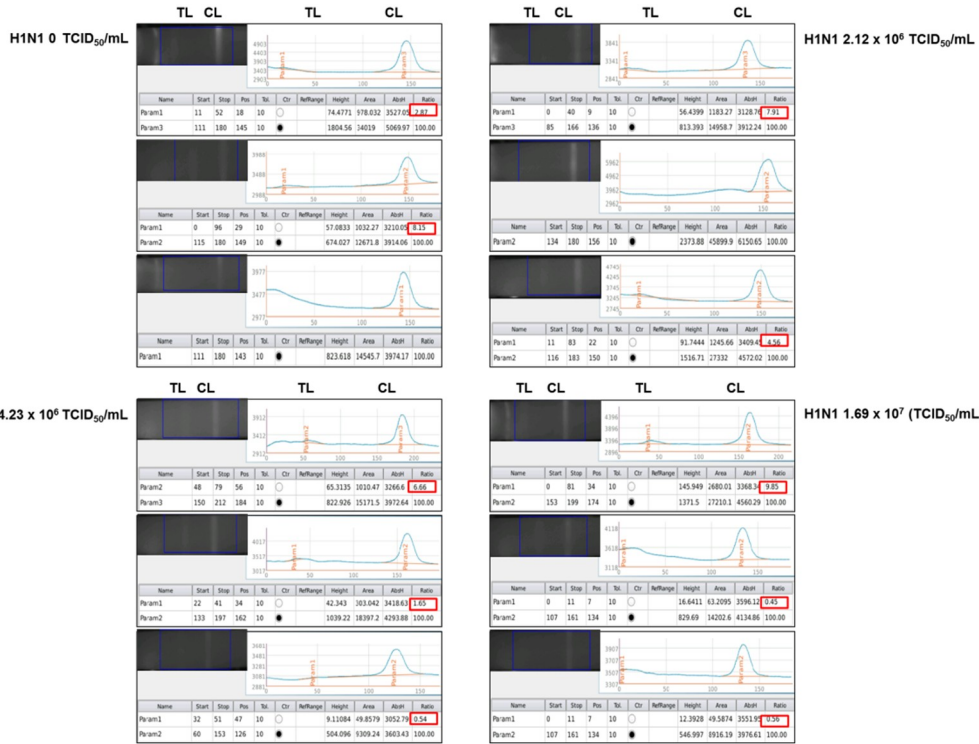

**B**

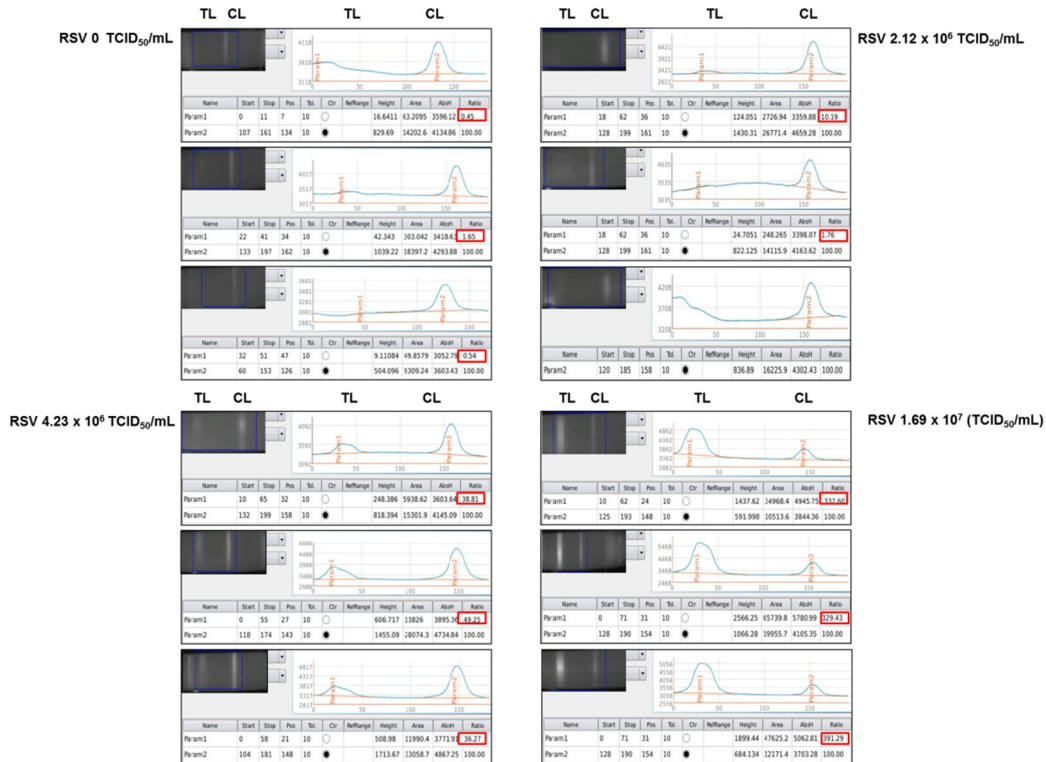

**Figure S3. Raw data of FICT assay with virus. (A) H1N1 and RSV(B). Red box indicates each value of TL/CL.**

# A

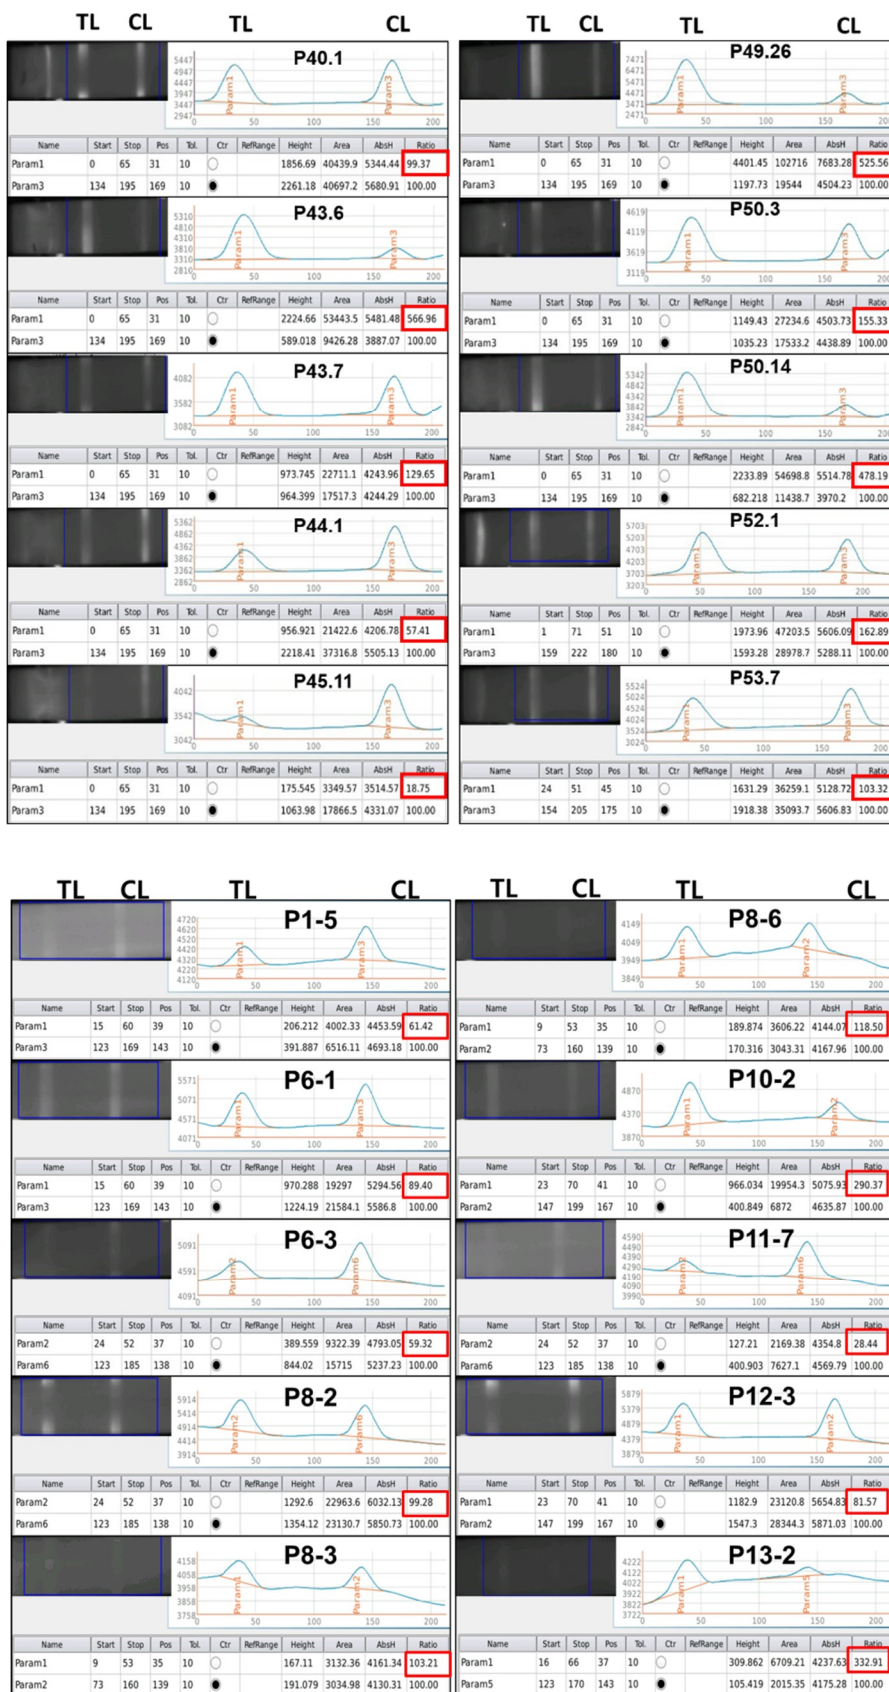

# B

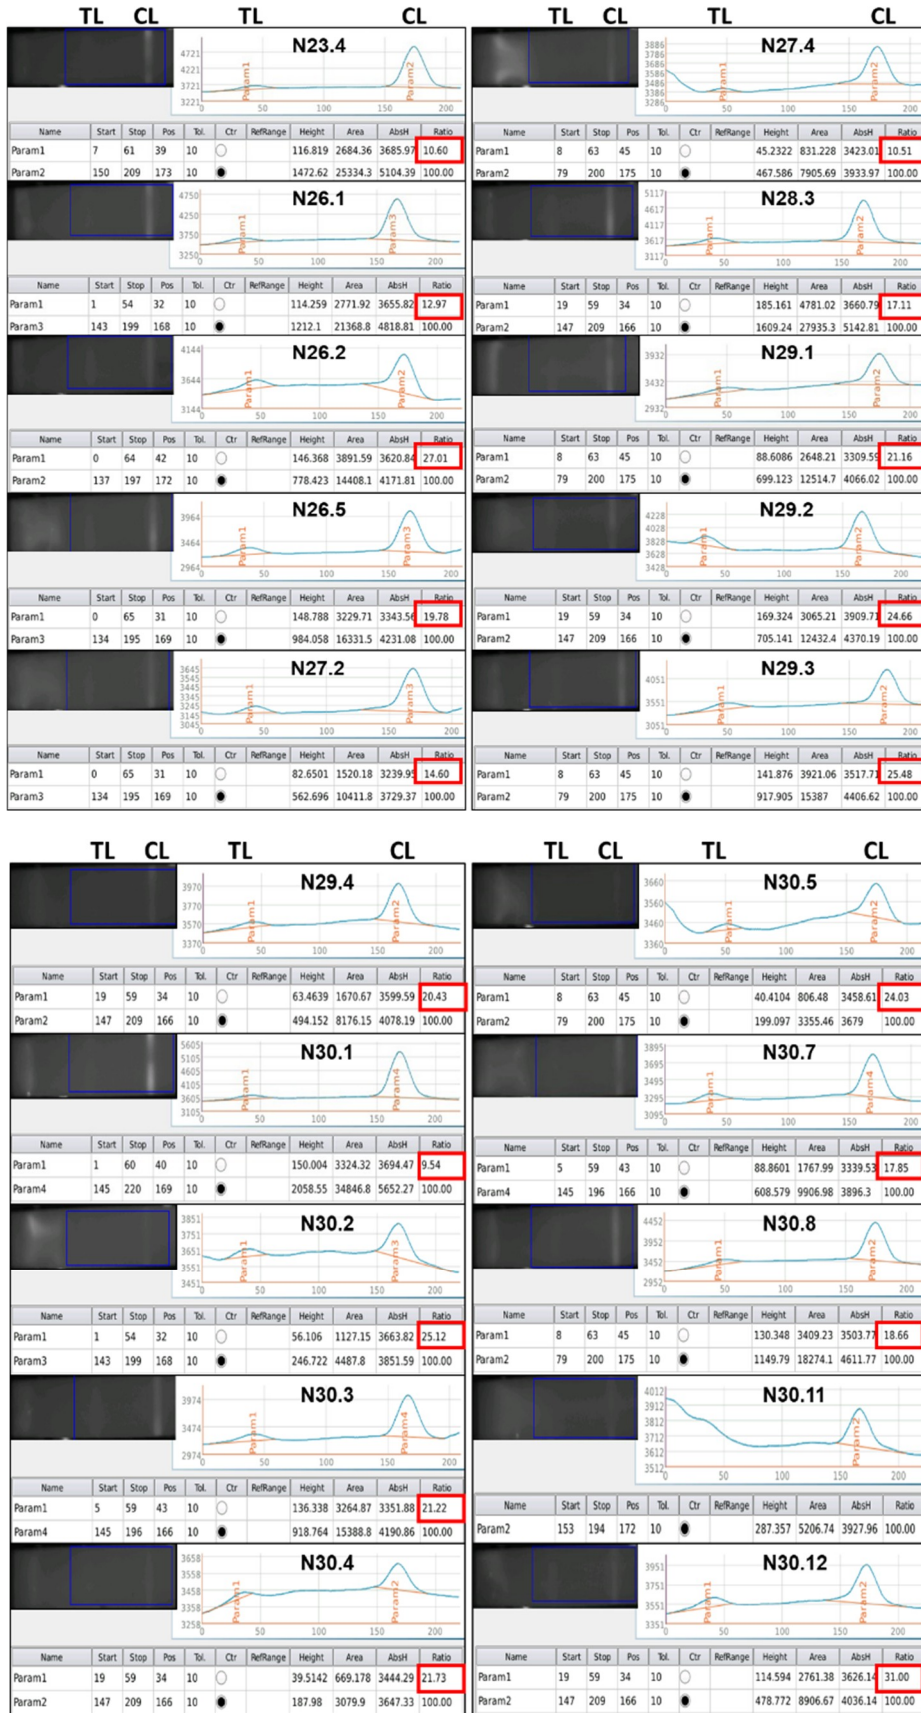

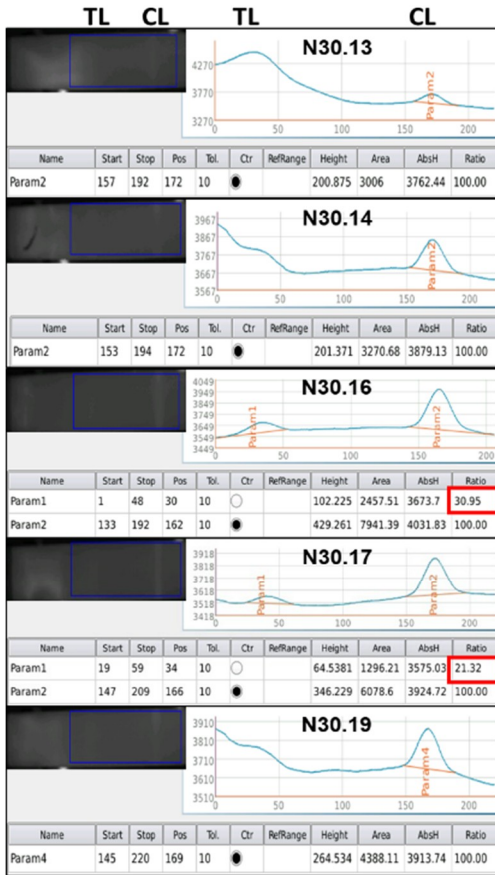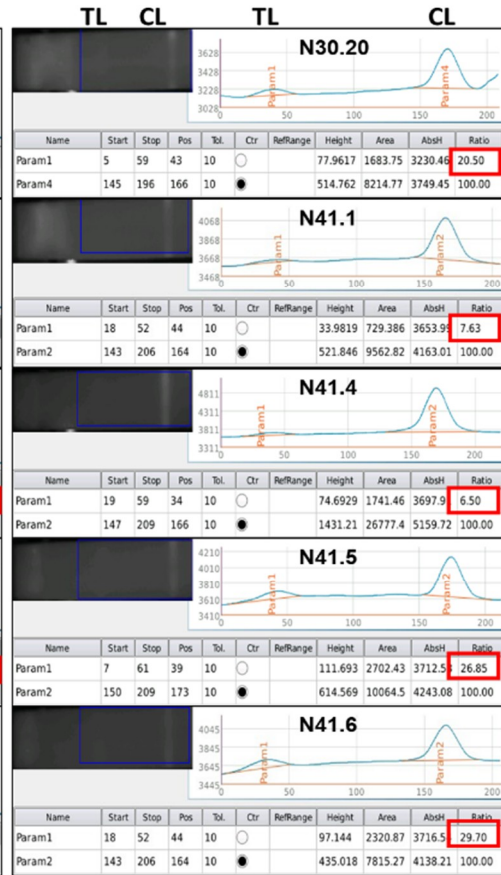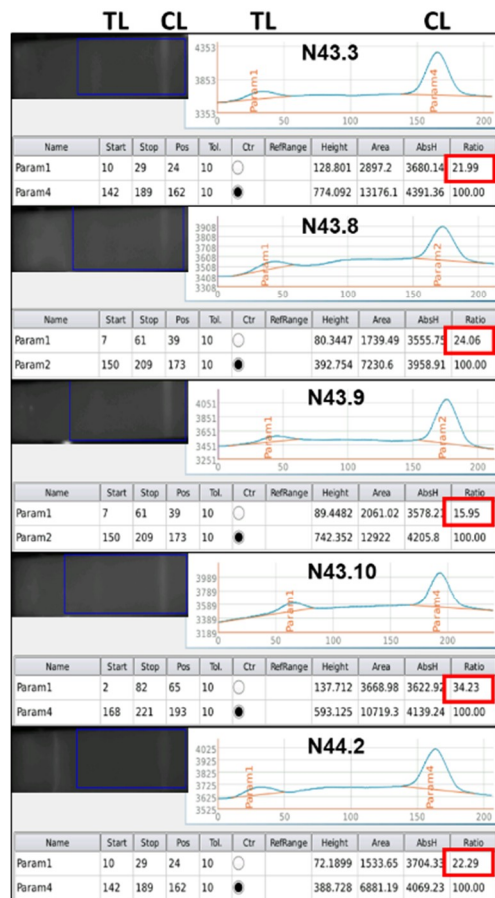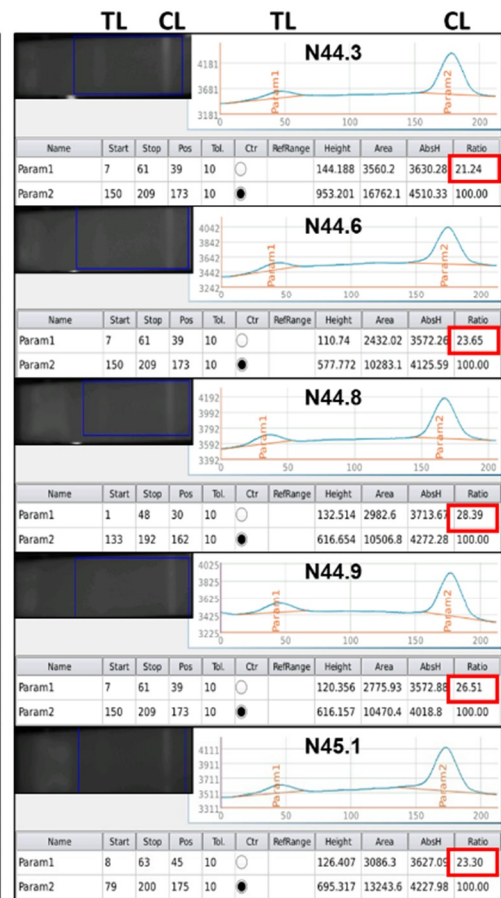

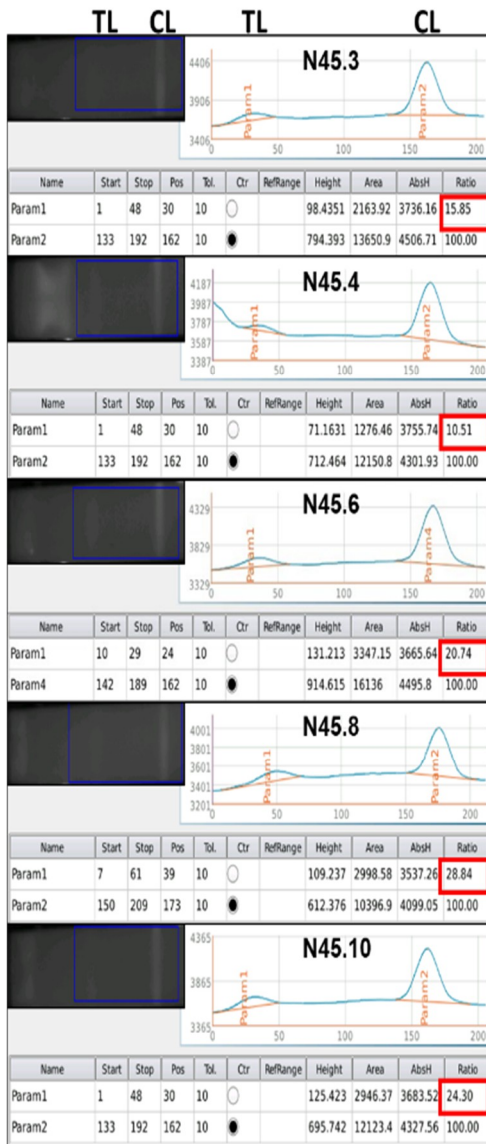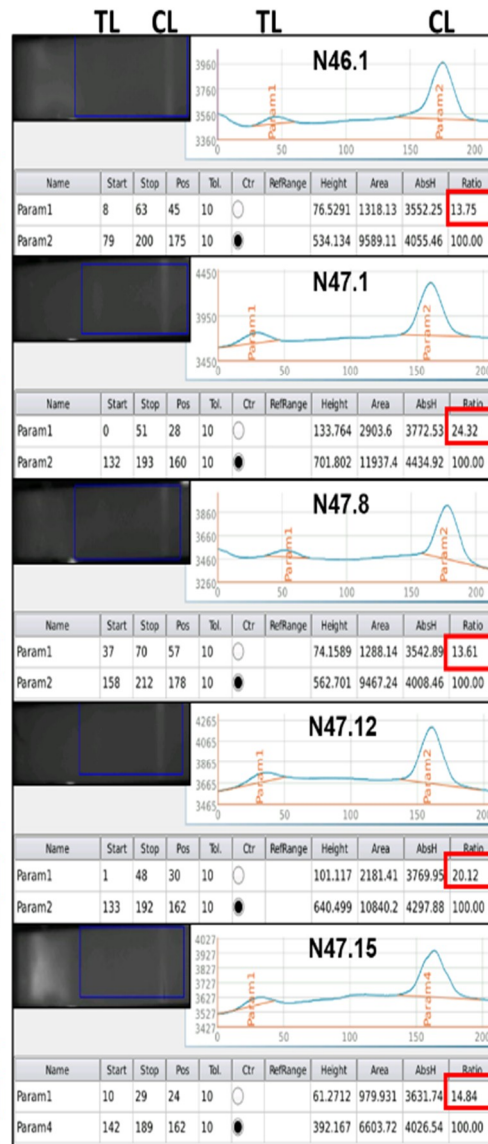



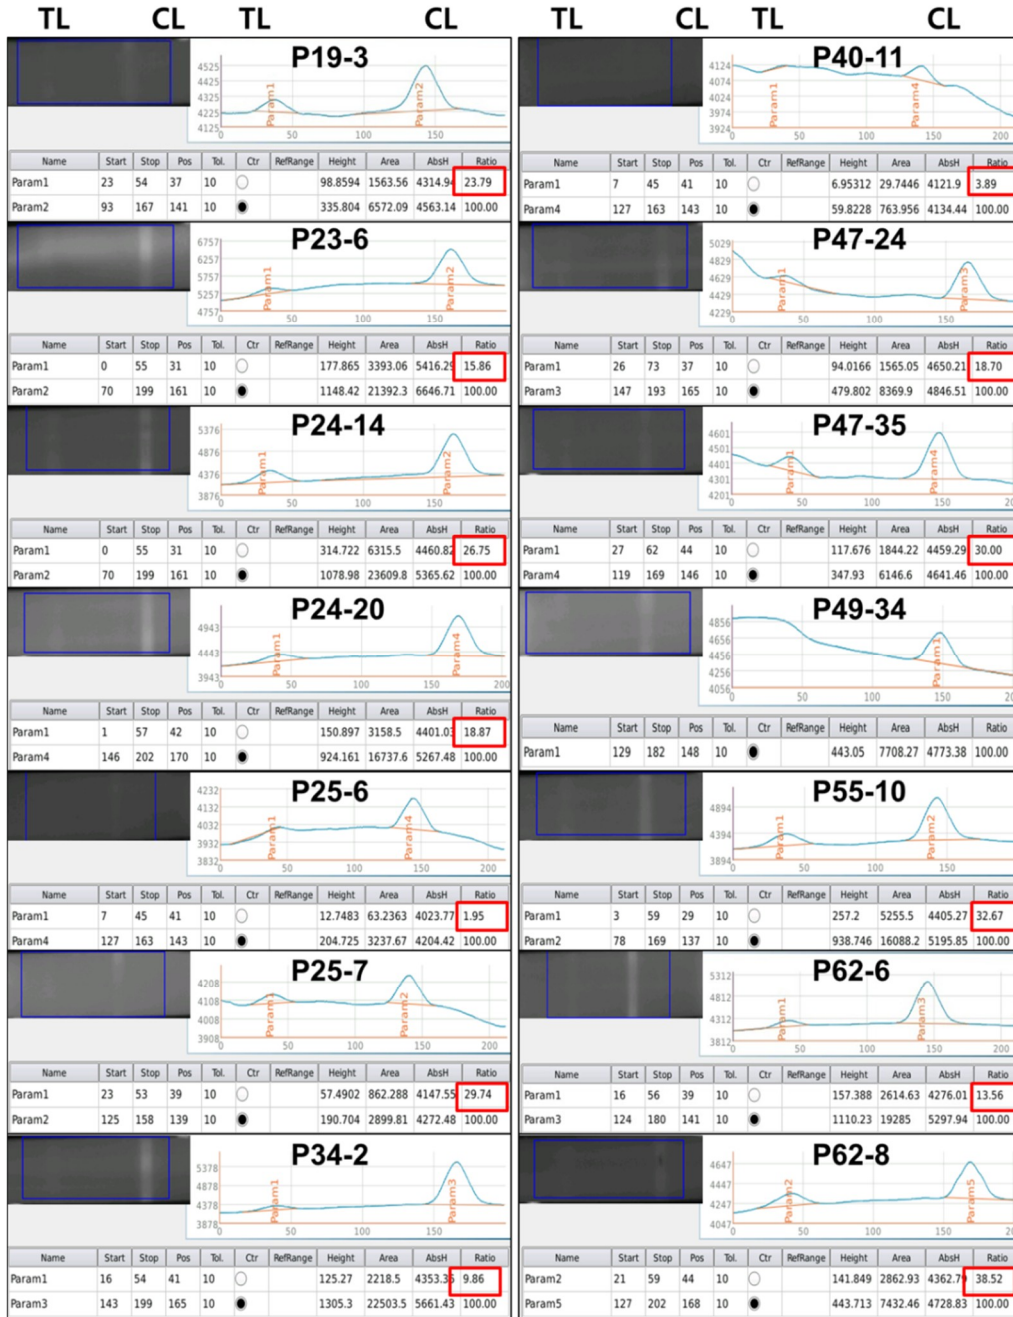

| TL     | CL    | TL   | CL  | TL   | CL   | TL       | CL      |         |         |        |
|--------|-------|------|-----|------|------|----------|---------|---------|---------|--------|
|        |       |      |     |      |      |          |         |         |         |        |
| Name   | Start | Stop | Pos | Tol. | Ctrl | RefRange | Height  | Area    | AbsH    | Ratio  |
| Param2 | 21    | 59   | 44  | 10   | ○    |          | 105.141 | 2359.44 | 4599.66 | 22.40  |
| Param5 | 127   | 202  | 168 | 10   | ●    |          | 591.156 | 10534.7 | 5232.89 | 100.00 |
|        |       |      |     |      |      |          |         |         |         |        |
| Name   | Start | Stop | Pos | Tol. | Ctrl | RefRange | Height  | Area    | AbsH    | Ratio  |
| Param1 | 3     | 59   | 29  | 10   | ○    |          | 220.591 | 4497.2  | 4410.63 | 28.63  |
| Param2 | 78    | 169  | 137 | 10   | ●    |          | 819.92  | 15706.9 | 5058.02 | 100.00 |
|        |       |      |     |      |      |          |         |         |         |        |
| Name   | Start | Stop | Pos | Tol. | Ctrl | RefRange | Height  | Area    | AbsH    | Ratio  |
| Param1 | 3     | 59   | 29  | 10   | ○    |          | 463.038 | 9489.51 | 4585.5  | 63.31  |
| Param2 | 78    | 169  | 137 | 10   | ●    |          | 806.971 | 14990.1 | 5066.22 | 100.00 |
|        |       |      |     |      |      |          |         |         |         |        |
| Name   | Start | Stop | Pos | Tol. | Ctrl | RefRange | Height  | Area    | AbsH    | Ratio  |
| Param1 | 6     | 59   | 41  | 10   | ○    |          | 146.805 | 2898.14 | 4399.4  | 28.55  |
| Param4 | 148   | 199  | 169 | 10   | ●    |          | 594.253 | 10152.3 | 4984.24 | 100.00 |
|        |       |      |     |      |      |          |         |         |         |        |
| Name   | Start | Stop | Pos | Tol. | Ctrl | RefRange | Height  | Area    | AbsH    | Ratio  |
| Param2 | 21    | 59   | 44  | 10   | ○    |          | 114.315 | 2143.24 | 4525.36 | 9.22   |
| Param5 | 127   | 202  | 168 | 10   | ●    |          | 1257.11 | 23247.1 | 5688.35 | 100.00 |
|        |       |      |     |      |      |          |         |         |         |        |
| Name   | Start | Stop | Pos | Tol. | Ctrl | RefRange | Height  | Area    | AbsH    | Ratio  |
| Param1 | 24    | 54   | 39  | 10   | ○    |          | 60.0083 | 1065.58 | 4112.34 | 14.92  |
| Param5 | 104   | 212  | 141 | 10   | ●    |          | 223.407 | 7142.11 | 4289.82 | 100.00 |
|        |       |      |     |      |      |          |         |         |         |        |
| Name   | Start | Stop | Pos | Tol. | Ctrl | RefRange | Height  | Area    | AbsH    | Ratio  |
| Param1 | 27    | 62   | 44  | 10   | ○    |          | 143.615 | 2316.01 | 4490.3  | 17.82  |
| Param4 | 119   | 169  | 146 | 10   | ●    |          | 706     | 12999.1 | 4967.81 | 100.00 |
|        |       |      |     |      |      |          |         |         |         |        |
| Name   | Start | Stop | Pos | Tol. | Ctrl | RefRange | Height  | Area    | AbsH    | Ratio  |
| Param1 | 0     | 55   | 31  | 10   | ○    |          | 154.02  | 2903.29 | 4257.58 | 24.15  |
| Param2 | 70    | 199  | 161 | 10   | ●    |          | 701.965 | 12024.3 | 4982.99 | 100.00 |
|        |       |      |     |      |      |          |         |         |         |        |
| Name   | Start | Stop | Pos | Tol. | Ctrl | RefRange | Height  | Area    | AbsH    | Ratio  |
| Param1 | 16    | 54   | 41  | 10   | ○    |          | 162.787 | 3127.3  | 4234.93 | 18.61  |
| Param3 | 143   | 199  | 165 | 10   | ●    |          | 952.218 | 16805.3 | 5223.91 | 100.00 |
|        |       |      |     |      |      |          |         |         |         |        |
| Name   | Start | Stop | Pos | Tol. | Ctrl | RefRange | Height  | Area    | AbsH    | Ratio  |
| Param1 | 16    | 56   | 39  | 10   | ○    |          | 3321.75 | 62927.1 | 8416.54 | 156.92 |
| Param3 | 124   | 180  | 141 | 10   | ●    |          | 2141.46 | 40101.9 | 6847.14 | 100.00 |
|        |       |      |     |      |      |          |         |         |         |        |
| Name   | Start | Stop | Pos | Tol. | Ctrl | RefRange | Height  | Area    | AbsH    | Ratio  |
| Param2 | 21    | 59   | 44  | 10   | ○    |          | 189.735 | 4309.38 | 4500.31 | 14.37  |
| Param5 | 127   | 202  | 168 | 10   | ●    |          | 1684.24 | 29988.7 | 6063.91 | 100.00 |
|        |       |      |     |      |      |          |         |         |         |        |
| Name   | Start | Stop | Pos | Tol. | Ctrl | RefRange | Height  | Area    | AbsH    | Ratio  |
| Param1 | 16    | 49   | 41  | 10   | ○    |          | 27.5598 | 217.371 | 4057.05 | 4.52   |
| Param4 | 149   | 212  | 171 | 10   | ●    |          | 270.973 | 4814.33 | 4266.86 | 100.00 |
|        |       |      |     |      |      |          |         |         |         |        |
| Name   | Start | Stop | Pos | Tol. | Ctrl | RefRange | Height  | Area    | AbsH    | Ratio  |
| Param1 | 16    | 62   | 40  | 10   | ○    |          | 230.479 | 4494.57 | 4407.32 | 42.32  |
| Param3 | 124   | 202  | 144 | 10   | ●    |          | 634.766 | 10620.1 | 4874.97 | 100.00 |
|        |       |      |     |      |      |          |         |         |         |        |
| Name   | Start | Stop | Pos | Tol. | Ctrl | RefRange | Height  | Area    | AbsH    | Ratio  |
| Param1 | 26    | 73   | 37  | 10   | ○    |          | 109.585 | 2375.34 | 4402.85 | 20.06  |
| Param3 | 147   | 193  | 165 | 10   | ●    |          | 654.343 | 11843.4 | 5068.74 | 100.00 |

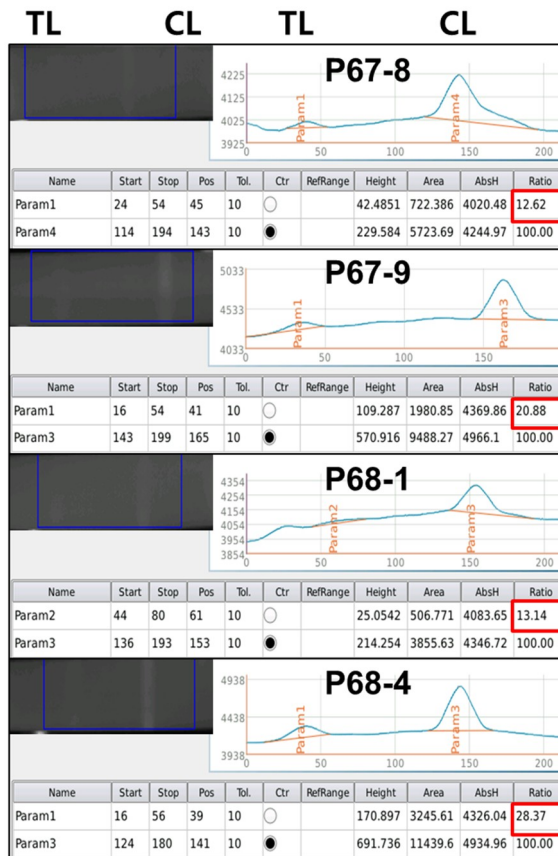

Figure S4. Raw data of FICT assay with clinical patients. RSV-negative patients (A) and RSV-positive patients (B).
